# Supplementary material for: Label-free and highly sensitive fluorescence detection of lead(ii) based on DNAzyme and exonuclease III-assisted cascade signal amplification
Source: Royal Society of Chemistry journal article supplement (doi:10.1039/c8nj06522e), 2019-01-01
Supplement: c8nj06522e1.pdf [file c8nj06522e1.pdf]

## Electronic Supplementary Information

### Label-free and highly sensitive fluorescence detection of lead(II) based on DNAzyme and exonuclease III-assisted cascade signal amplification

Jiafeng Pan,<sup>a</sup> Qiong Li,<sup>a,b</sup> Danhua Zhou,<sup>a,c</sup> and Junhua Chen\*<sup>a</sup>

<sup>a</sup>Guangdong Key Laboratory of Integrated Agro-environmental Pollution Control and Management, Guangdong Institute of Eco-environmental Science & Technology, Guangzhou 510650, China

<sup>b</sup>College of Bioscience and Biotechnology, Hunan Agricultural University, Changsha, 410128, China

<sup>c</sup>College of Natural Resources and Environment, South China Agricultural University, Guangzhou, 510642, China

\*Corresponding author

Email: 222chenjunhua@163.com

## Supplemental Figures

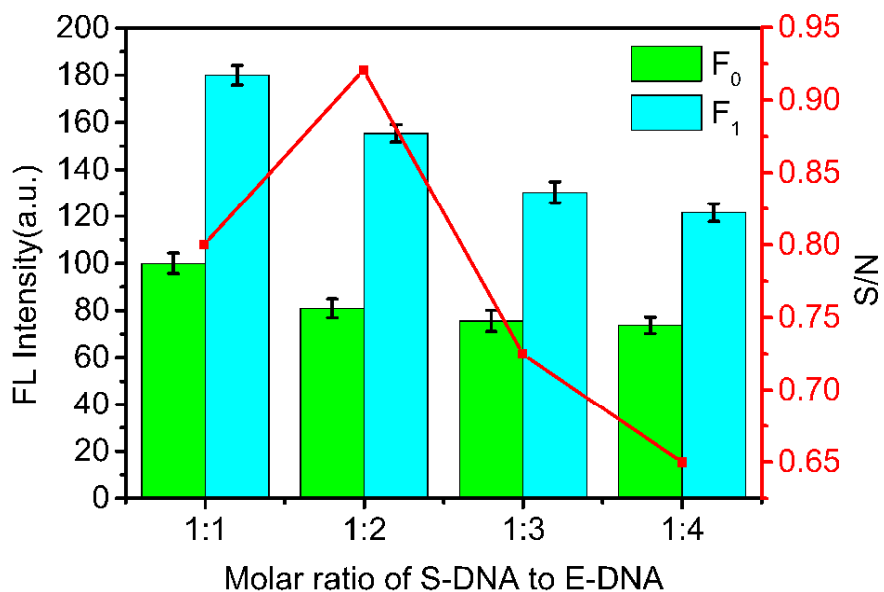

Fig. S1. Effect of the ratio of S-DNA to E-DNA on the performance of the sensing platform.  $F_0$  and  $F_1$  represent the fluorescence intensities at 408 nm before and after addition of  $Pb^{2+}$  (10  $\mu M$ ), respectively. The solution contains 50 nM S-DNA, 1  $\mu M$  the ATMND/HP1 and 50 U Exo III. Error bars represent the standard deviation of three independent measurements.

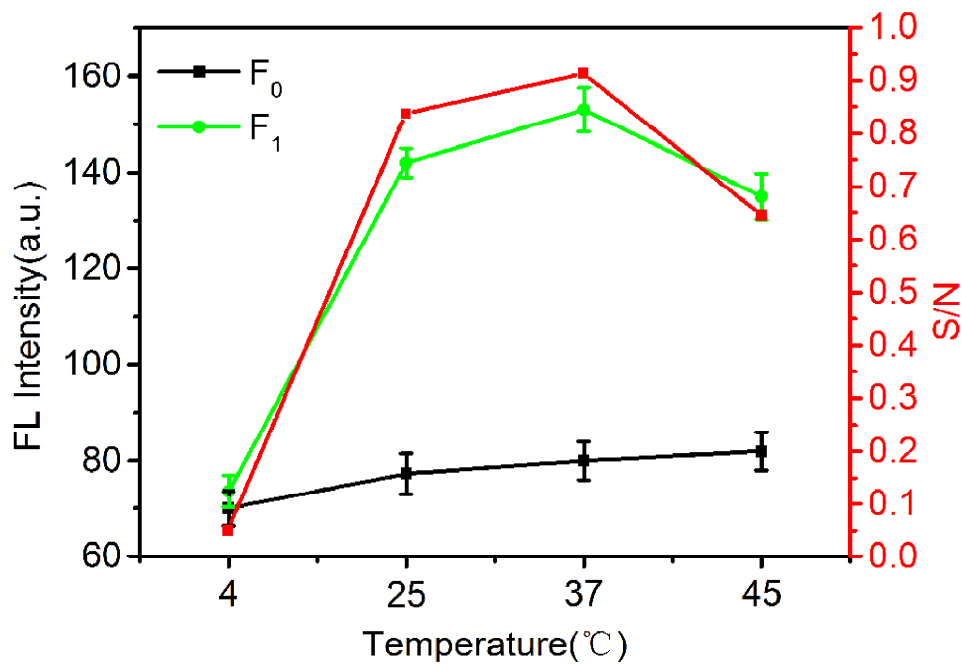

Fig. S2. Effect of the temperature on the performance of the sensing platform.  $F_0$  and  $F_1$  represent the fluorescence intensities at 408 nm before and after addition of  $Pb^{2+}$  ( $10 \mu M$ ), respectively. The solution contains 50 nM S-DNA, 100 nM E-DNA,  $1 \mu M$  the ATMND/HP1 and 50 U Exo III. Error bars represent the standard deviation of three independent measurements.

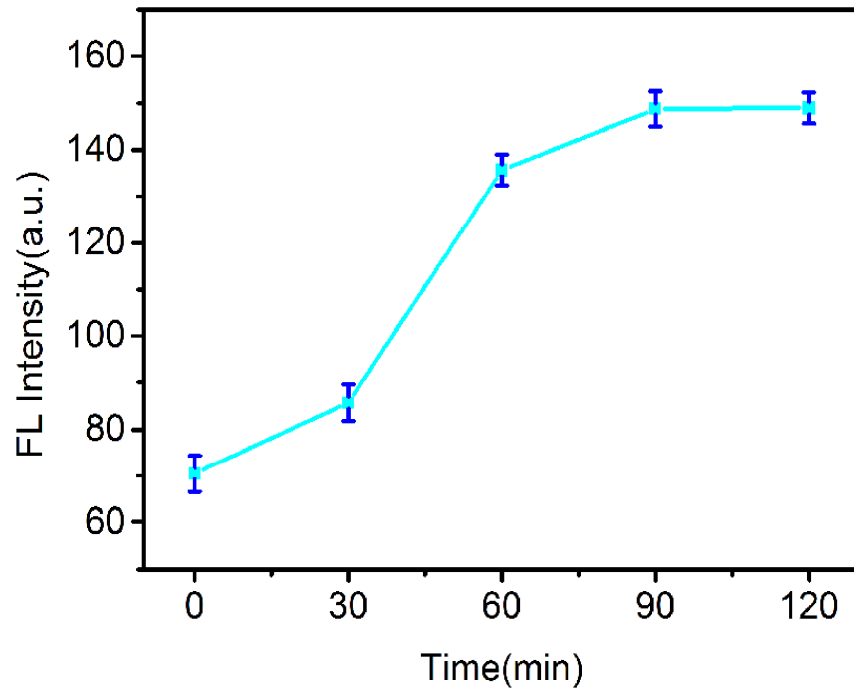

Fig. S3. Effect of the incubation time on the performance of the sensing platform. The solution contains 50 nM S-DNA, 100 nM E-DNA, 1  $\mu$ M the ATMND/HP1 and 50 U Exo III. Error bars represent the standard deviation of three independent measurements.

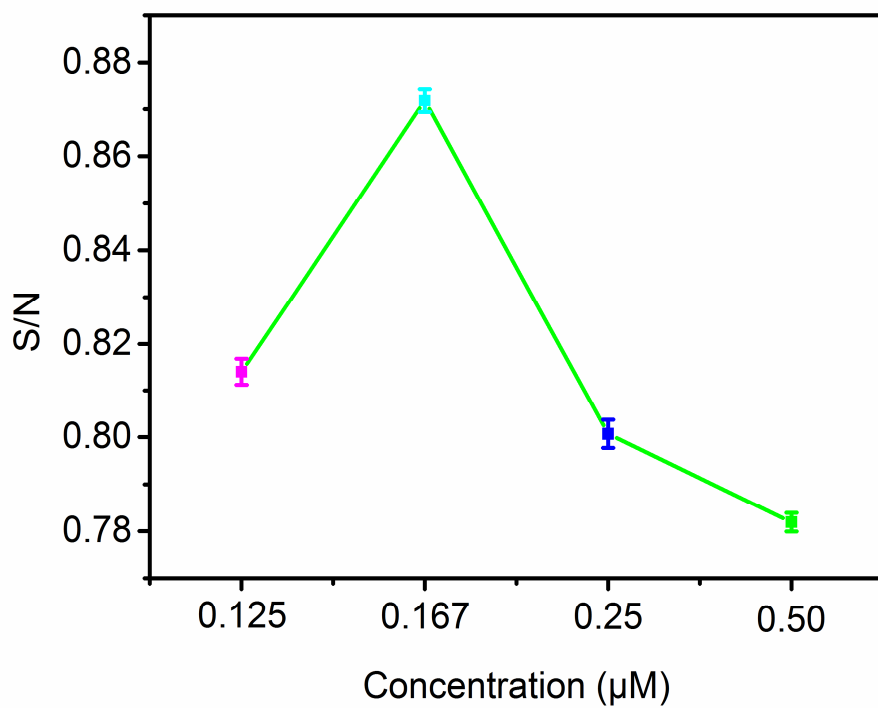

Fig. S4. Effect of the ATMND concentration on the performance of the sensing platform. The solution contains 1 µM HP1. Error bars represent the standard deviation of three independent measurements.

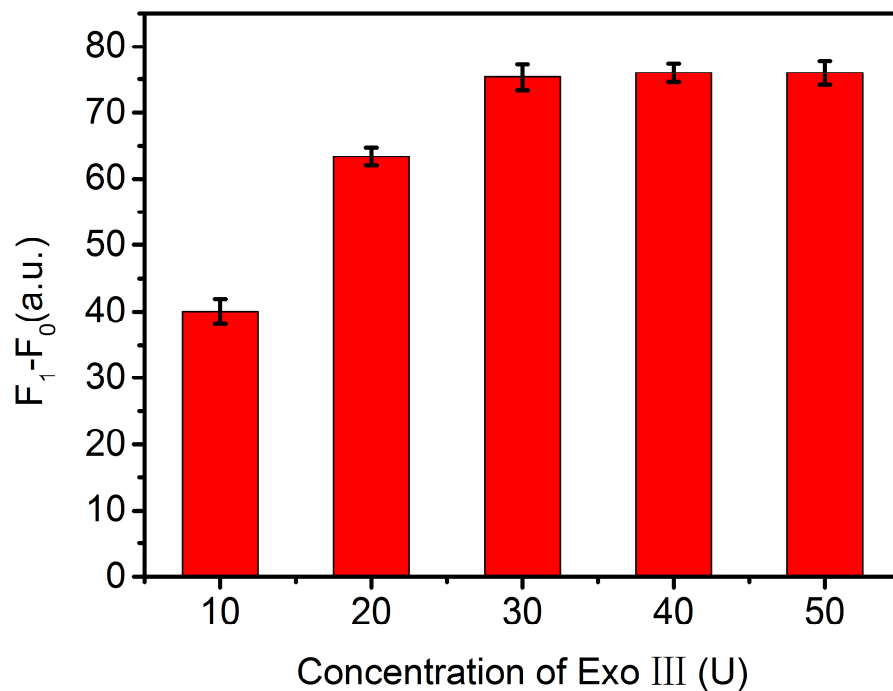

Fig. S5. Effect of the concentration of Exo III on the performance of the sensing platform.  $F_0$  and  $F_1$  represent the fluorescence intensities at 408 nm before and after addition of  $Pb^{2+}$  (10  $\mu M$ ), respectively. The solution contains 50 nM S-DNA, 100 nM E-DNA, 1  $\mu M$  the ATMND/HP1. Error bars represent the standard deviation of three independent measurements.

## Supplemental Table

Table S1. Comparison of currently available methods for the detection of Pb<sup>2+</sup>.

| Method                  | Strategy                                                                 | Detection limit | Ref.        |
|-------------------------|--------------------------------------------------------------------------|-----------------|-------------|
| Fluorescent             | Abasicsite-containing DNAzyme                                            | 4 nM            | [1]         |
| Fluorescent             | DNA PS2.M functionalized CdS                                             | 10 nM           | [2]         |
| Electrochemiluminescent | Ru 1 modified DNAzyme                                                    | 1.4 pM          | [3]         |
| Electrochemical         | G-quadruplexDNAzyme                                                      | 10 pM           | [4]         |
| Electrochemical         | 3D-printed thin-layer flow cell and<br>flow-field shaped solid electrode | 1 nM            | [5]         |
| Chemiluminescent        | G-quadruplexDNAzyme                                                      | 1 nM            | [6]         |
| Colorimetric            | DNAzymefunctionalizedAuNPs                                               | 0.5 μM          | [7]         |
| Colorimetric            | Glutathione modified AuNPs                                               | 13 nM           | [8]         |
| SERS                    | DNAzyme and AuNPs                                                        | 20 nM           | [9]         |
| Photoelectrochemical    | Methylene blue embedded 3D DNA<br>networks                               | 0.03 pM         | [10]        |
| Fluorescent             | DNAzyme and ExoIII-assisted<br>cascade signalamplification               | 50 pM           | [This work] |

## References

1. Y. Xiang, A. Tong, Y. Lu, *J. Am. Chem. Soc.*, 2009, **131**, 15352-15357.
2. S. Liu, W. Na, S. Pang, X. Su, *Biosens. Bioelectron.*, 2014, **58**, 17-21.
3. F. Ma, B. Sun, H. Qi, H. Zhang, Q. Gao, C. Zhang, *Anal. Chim. Acta.*, 2011, **683**, 234-241.
4. Z. Lin, X. Li, H. B. Kraatz, *Anal. Chem.*, 2011, **83**, 6896-6901.
5. Q. Sun, J. Wang, M. Tang, L. Huang, Z. Zhang, C. Liu, X. Lu, K. W. Hunter, *Anal. Chem.*, 2017, **89**, 5024-5029.
6. T. Li, E. Wang, S. Dong, *Anal. Chem.*, 2010, **82**, 1515-1520.

7. D. Mazumdar, J. Liu, G. Lu, J. Zhou, Y. Lu, *Chem. Commun.*, 2010, **46**, 1416-1418.
8. Y. Yu, Y. Hong, P. Gao, M. K. Nazeeruddin, *Anal. Chem.*, 2016, **88**, 12316-12346.
9. Y. Wang, J. Irudayaraj, *Chem. Commun.*, 2011, **47**, 4394-4396.
10. L. Huang, L. Yang, C. Zhu, H. Deng, G. Liu, Y. Yuan, *Sens. Actuators B Chem.*, 2018, **274**, 458-463.
